# Supplementary material for: Early gut mycobiota and mother-offspring transfer
Source: PubMed Central journal article supplement (PMC5571498; doi:10.1186/s40168-017-0319-x), 2017-08-24

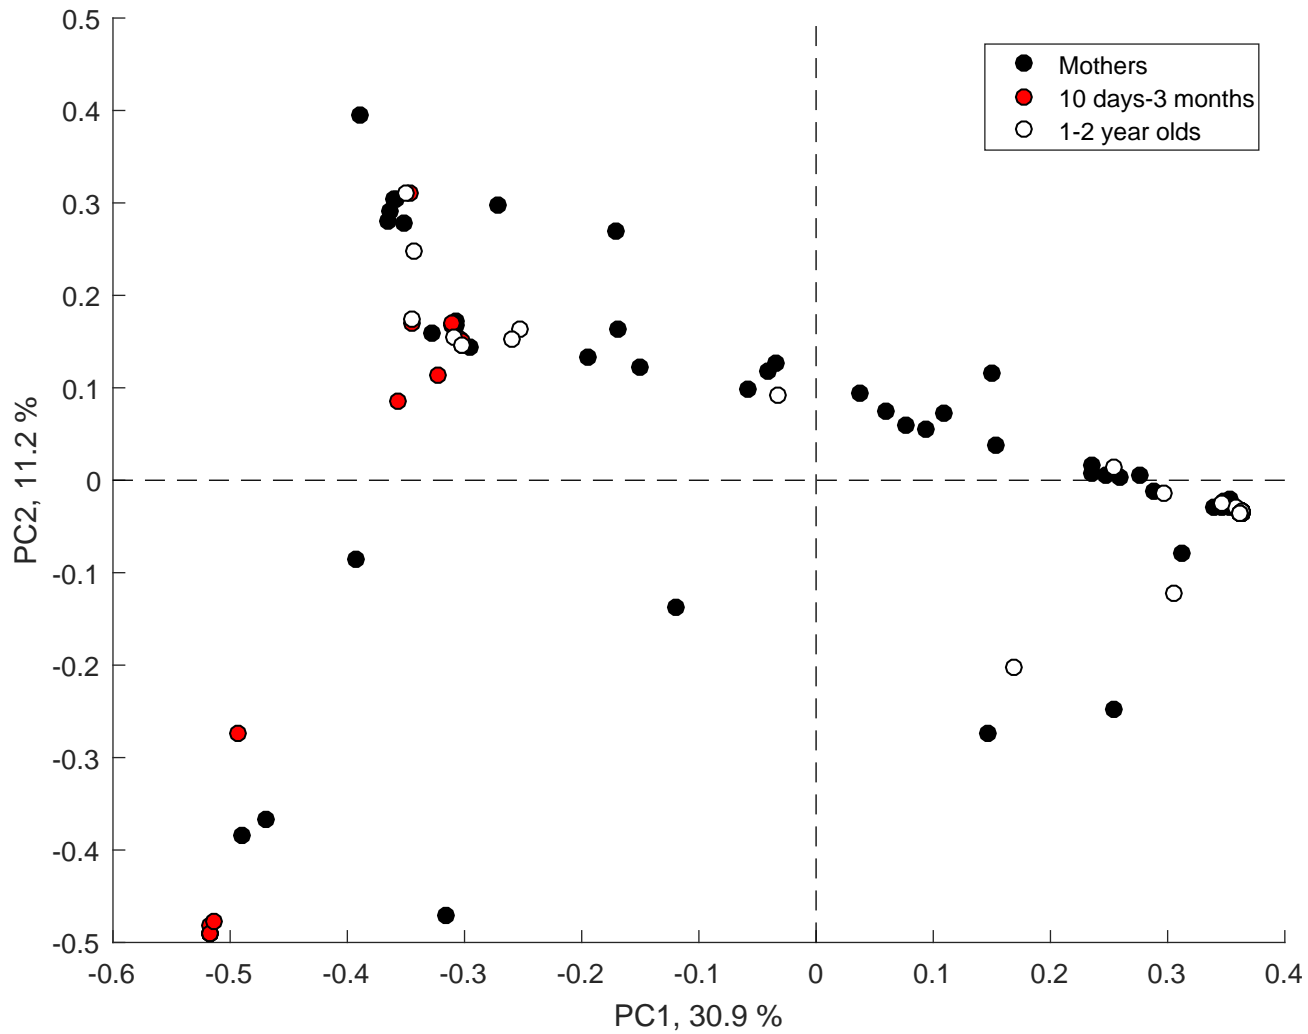

Supplement: 40168_2017_319_MOESM6_ESM.pdf [file 40168_2017_319_MOESM6_ESM.pdf]
